# Supplementary material for: Changes in nonalcoholic fatty liver disease and M2BPGi due to lifestyle intervention in primary healthcare
Source: PubMed Central journal article supplement (PMC10903829; doi:10.1371/journal.pone.0298151), 2024-02-29
Supplement: pone.0298151.s004.pdf [file pone.0298151.s004.pdf]

Table A. The number of participants in each grade of fatty liver using ultrasonography at baseline and 12-month.

|          |          | After 12 month |           |          |        | Total |
|----------|----------|----------------|-----------|----------|--------|-------|
|          |          | Normal         | Mild      | Moderate | Severe |       |
| Baseline | Normal   | 0              | 0         | 0        | 0      | 0     |
|          | Mild     | <b>8</b>       | 20        | 7        | 0      | 35    |
|          | Moderate | <b>1</b>       | <b>21</b> | 43       | 1      | 66    |
|          | Severe   | <b>1</b>       | <b>2</b>  | <b>1</b> | 3      | 7     |
| Total    |          | 10             | 43        | 51       | 4      | 108   |

Thick letters indicate participant numbers of fatty liver improving after 12 months.

Table B. The lifestyle behavior characteristics of participants at baseline and follow-up times.

|                            | Baseline        | After 6 month<br>(T6) | After 12 month<br>(T12) | <i>P</i> | Post hoc <sup>†</sup> |
|----------------------------|-----------------|-----------------------|-------------------------|----------|-----------------------|
| Physical Activity,<br>IPAQ |                 |                       |                         |          |                       |
| Low                        | 26 (24.1)       | 15 (14.3)             | 14 (13.6)               | 0.024    |                       |
| Moderate                   | 56 (51.9)       | 57 (54.3)             | 43 (41.8)               |          |                       |
| High                       | 26 (24.1)       | 33 (31.4)             | 46 (44.7)               |          |                       |
| Mean±SD                    | 2186.0 ± 2201.3 | 2670.3 ± 2572.0       | 3302.1 ± 2843.4         | <0.001   | T0<T6,<br>T6<T12      |
| Diet, MDA                  |                 |                       |                         |          |                       |
| Good                       | 13 (12)         | 8 (7.5)               | 6 (5.6)                 | <0.001   |                       |
| Fair                       | 60 (55.6)       | 38 (35.5)             | 44 (40.7)               |          |                       |
| Poor                       | 35 (32.4)       | 61 (57)               | 58 (53.7)               |          |                       |
| Mean±SD                    | 30.7 ± 6.8      | 27.1 ± 6.7            | 27.5 ± 6.6              | <0.001   | T0>T6                 |

Data are mean±standard deviation or *n* (%) values.

Abbreviation: IPAQ, international physical activity questionnaire; SD, standard deviation; MDA, mini dietary assessment.

<sup>†</sup>Post-hoc comparisons were performed using Bonferroni adjustment for multiple comparisons.
